# Supplementary material for: Ligand effect on the kinetics of hydroperoxochromium(iii)–oxochromium(v) transformation and the lifetime of chromium(v)
Source: Royal Society of Chemistry journal article supplement (doi:10.1039/b511084j), 2005-10-26
Supplement: b511084j.pdf [file b511084j.pdf]

## Ligand Effect on the Kinetics of Hydroperoxochromium(III) - Oxochromium(V) Transformation and the Lifetime of Chromium(V)

Kelemu Lemma, Arkady Ellern and Andreja Bakac\*

Contribution from the Chemistry Department, Iowa State University of Science and Technology,  
Ames, IA 50011

**Figure S1.** Plot of  $k_{\text{obs}}$  vs  $[\text{O}_2]$  for  $\text{O}_2$  binding to  $\text{L}^2\text{Cr}(\text{H}_2\text{O})_2^{2+}$ . The intercept is the sum of all the first- or pseudo-first-order rate constants for disappearance of  $\text{L}^2\text{Cr}(\text{H}_2\text{O})_2^{2+}$  except for the reaction with  $\text{O}_2$ .

**Figure S2.** Plot of  $\ln(k_1/T)$  vs  $1/T$  for the formation of  $\text{L}^2\text{Cr}(\text{V})$ .

**Figure S3.** Plots of  $\ln(k_2/T)$  vs  $1/T$  for the decay of  $\text{L}^2\text{Cr}(\text{V})$ .

**Figure S4.** Plot of  $k_{\text{obs}}$  vs  $[\text{ABTS}^{2-}]$  for the reaction between  $\text{L}^2(\text{H}_2\text{O})\text{CrOO}^{2+}$  and  $\text{ABTS}^{2-}$  at  $[\text{H}^+] = 20 \text{ mM}$ . Traces were exponential at low ( $<0.04 \text{ mM}$ ) and high ( $>0.15 \text{ mM}$ ) concentrations of  $\text{ABTS}^{2-}$ , but exhibited approximately biphasic behavior in the intermediate regime. The rate constants  $k_{\text{obs}}$  shown for the intermediate regime are approximate values obtained from single-exponential fits. The rate constants for the initial redox step between  $\text{L}^2(\text{H}_2\text{O})\text{CrOO}^{2+}$  and  $\text{ABTS}^{2-}$ , and  $k_1$ , were obtained from the data in the limits of low and high  $[\text{ABTS}^{2-}]$ , respectively.

**Figure S5.** Plot of  $k_{\text{obs}}/[\text{I}^-]$  vs.  $[\text{H}^+]$  for the reaction of  $\text{L}^2(\text{H}_2\text{O})\text{CrOO}^{2+}$  with  $\text{I}^-$ .

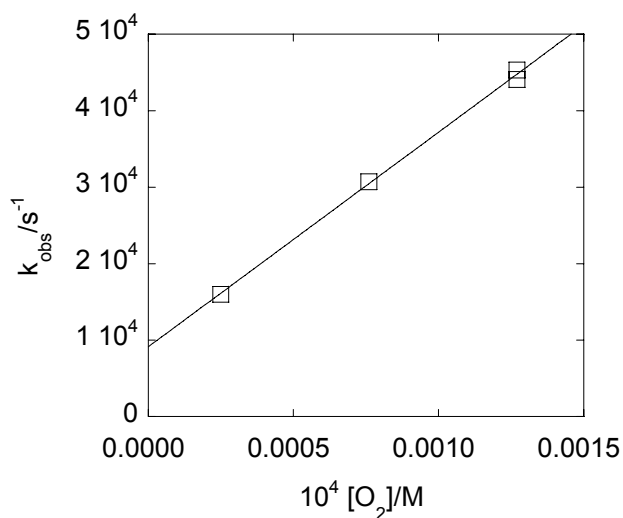

**Figure S1.** Plot of  $k_{\text{obs}}$  vs  $[\text{O}_2]$  for  $\text{O}_2$  binding to  $\text{L}^2\text{Cr}(\text{H}_2\text{O})_2^{2+}$ . The intercept is the sum of all the first- or pseudo-first-order rate constants for disappearance of  $\text{L}^2\text{Cr}(\text{H}_2\text{O})_2^{2+}$  except for the reaction with  $\text{O}_2$ .

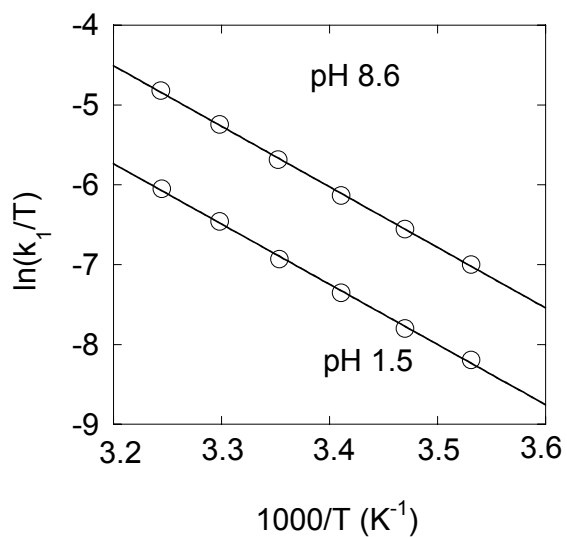

**Figure S2.** Plot of  $\ln(k_1/T)$  vs  $1/T$  for the formation of  $\text{L}^2\text{Cr}(\text{V})$ .

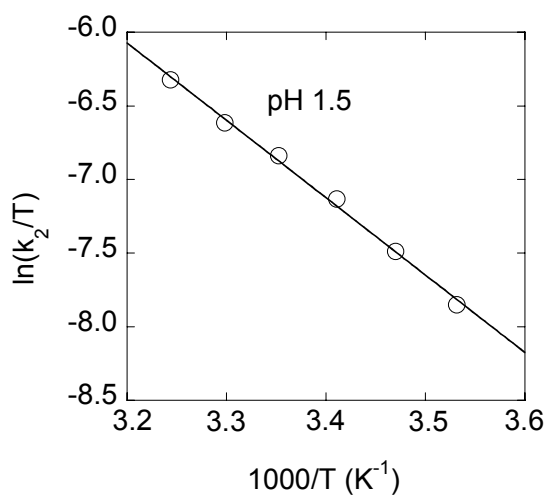

**Figure S3.** Plots of  $\ln(k_2/T)$  vs  $1/T$  for the decay of L<sup>2</sup>Cr(V).

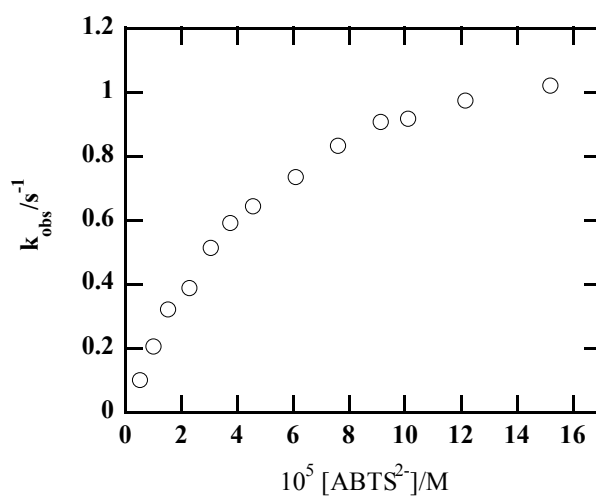

**Figure S4.** Plot of  $k_{\text{obs}}$  vs  $[\text{ABTS}^{2-}]$  for the reaction between L<sup>2</sup>(H<sub>2</sub>O)CrOO<sup>2+</sup> and ABTS<sup>2-</sup> at  $[\text{H}^+] = 20$  mM. Traces were exponential at low ( $<0.04$  mM) and high ( $>0.15$  mM) concentrations of ABTS<sup>2-</sup>, but exhibited approximately biphasic behavior in the intermediate

regime. The rate constants  $k_{\text{obs}}$  shown for the intermediate regime are approximate values obtained by forcing the fit to a single-exponential equation. The rate constants for the initial redox step between  $\text{L}^2(\text{H}_2\text{O})\text{CrOO}^{2+}$  and  $\text{ABTS}^{2-}$ , and  $k_1$ , were obtained from the data in the limits of low and high  $[\text{ABTS}^{2-}]$ , respectively.

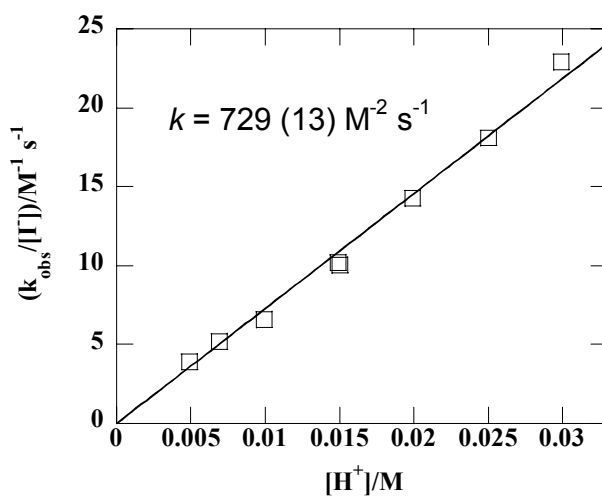

**Figure S5.** Plot of  $k_{\text{obs}}/[\text{I}]$  vs  $[\text{H}^+]$  for the reaction of  $\text{L}^2(\text{H}_2\text{O})\text{CrOO}^{2+}$  with  $\text{I}^-$ .
